# Supplementary material
Source: publisher figshare collection journal article supplement (https://acs.figshare.com/ndownloader/files/3749371)
Supplement: Supplementary file 1 [file 3749371]

1 **Supporting Information for**  
2 **Reducing NO<sub>x</sub> emissions for a 600 MW<sub>e</sub> down-fired**  
3 **pulverized-coal utility boiler by applying a novel combustion**  
4 **system**

5  
6 Lun Ma<sup>†</sup>, Qingyan Fang<sup>†\*</sup>, Dangzhen Lv<sup>†\*</sup>, Cheng Zhang<sup>†</sup>, Yiping Chen<sup>‡</sup>, Gang  
7 Chen<sup>†</sup>, Xuenong Duan<sup>‡</sup>, Xihuan Wang<sup>††</sup>  
8

9 <sup>†</sup> State Key Laboratory of Coal Combustion, Huazhong University of Science and  
10 Technology, Wuhan 430074, P R China

11 <sup>‡</sup> Electric Power Research Institute, Hunan Power Company, Changsha 410000,  
12 P R China

13 <sup>††</sup> Jinzhushan thermal power company, Datang Huayin electric power Limited by  
14 Share Ltd, Loudi 417500, P R China

15  
16  
17  
18  
19  
20 A manuscript submitted to  
21 ***Environmental Science & Technology***

22 

---

23 \* to whom all correspondence should be addressed

24 Qingyan Fang

25 Address: State Key Laboratory of Coal Combustion, Huazhong University of  
26 Science and Technology, Wuhan 430074, P R China

27 Tel.: +86 27-87540249; fax: +86-27-87540249; e-mail: qyfang@hust.edu.cn.

28 Dangzhen Lv

29 Address: Electric Power Research Institute, Hunan Power Company, Changsha  
30 410000, P R China

31 Tel.: +86 731-85605384; fax: +86 731-85605384; e-mail: dangzhenlv@163.com.

33 Figure Caption

34 Figure S1. Schematics of the original combustion system of the down-fired boiler  
35 (dimensions in mm).

36 Figure S2. Schematics of the combustion system of the down-fired boiler with the  
37 novel combustion system.

38 Figure S3. Detailed schematics of the novel combustion system

39 Figure S4. CFD model and grid division of the novel combustion system

40

41 Table Caption

42 Table S1. Reaction kinetic data of devolatilization and char combustion

### 43 **1. Brief Introduction of Utility Boiler**

44 Figure S1 shows the schematics of the original combustion system of the  
45 down-fired boiler. Seventy-two direct-flow burner nozzles with double cyclone  
46 separators are arranged symmetrically on the arches. Primary air under the centrifugal  
47 effect of cyclone separators is divided into two parts: the fuel-rich coal/air streaming  
48 in dense phase region and the fuel-lean coal/air streaming (i.e., named the vent  
49 coal/air) in the dilute region. The main purpose of the burner design is to reduce  $\text{NO}_x$   
50 emissions by decreasing the air stoichiometric ratio and to promote ignition by raising  
51 the fuel concentration in the burner zone. The fuel-rich coal/air nozzles are installed  
52 near the back-fire side, while the fuel-lean coal/air nozzles are arranged over the  
53 back-fire side. Secondary air is gradually injected into the furnace and is separated  
54 into seven layers in the bellows (i.e., named A, B, C, D, E,  $F_1$  and  $F_2$ ). The first three  
55 secondary air nozzles (A, B and C) are arranged on the arches, while the remaining  
56 four secondary air nozzles (D, E,  $F_1$  and  $F_2$ ) are below the arches. Around the  
57 fuel-lean and fuel-rich coal/air nozzles, the A- and B-layer secondary air is  
58 transported through annular ports to cool the burner nozzles and strengthen the  
59 downward coal/air mixture. The C-layer secondary air was provided through a total of  
60 36 ports, which is close to the pulverized coal burner, and is supplied for the oil  
61 igniter. The remaining four layers of secondary air (i.e., D-, E-,  $F_1$ - and  $F_2$ ) are below  
62 the arches and account for the major share of the combustion air in the furnace. The  
63 air mixes gradually with the ignited coal/air flow, thereby forming air-staging  
64 combustion to lower  $\text{NO}_x$  emissions and regulate the flame penetration depth. The  
65 designed temperatures of main-steam and re-heat steam are both 814 K.

66 The schematics of the novel combustion system is shown in Figure S2, and  
67 Figure S3 displays the detailed schematic of the novel combustion system.

In addition, the designed parameters of the another similar modified FW down-fired boiler are similar to the studied boiler in this paper.

## **2. CFD Model, Grid Division, Numerical Simulation, and other Important Settings in the Simulations**

A geometric model was created and divided into several sections to accurately characterize the physical furnace. The different sections were meshed together with hexahedral mesh and coupled at the interface to improve the quality of the mesh. In order to minimize the numerical error, the mesh was refined in the burner zone with intense combustion and was consistent with the airflow direction in the furnace. Grid independence tests were carried out under the cells at 2800000, 3260000, 3820000 and 4270000. The mesh consisting of 3820000 cells (shown in Figure S4) was adopted for the calculations. The size distribution of the pulverized-coal particles followed Rosin-Rammler, with a minimum and maximum diameter of 5  $\mu\text{m}$  and 250  $\mu\text{m}$ , respectively. The average particle diameter was 54  $\mu\text{m}$  with a spread parameter of 1.05.

Coal devolatilization was simulated by the two-competing-rate mode [29-31]. The parameters about the two-competing-rate model and the diffusion/kinetics model are shown in Table S1.

devolatilization-1 at low temperature:

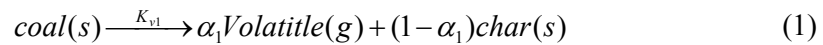

devolatilization-2 at high temperature:

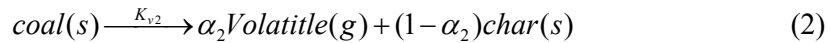

## **3. Full-Scale Industrial Measurements**

The coal characteristics were analyzed by Vario EL-2 for proximate analysis, and TGA-2000 for ultimate analysis. During the full-scale industrial experiments, the

93 following measurements were made: (1) temperature distributions along the axis of  
 94 one primary-air burner. These were carried out with a fine-wire thermocouple device  
 95 through inserting along the burner axis. And the mean gas temperature measurements  
 96 were performed with a 0.3 mm-diameter nickel-chromium/nickel-silicon  
 97 thermocouple. Heavy deposition of ash can be avoided as far as possible because of  
 98 the high velocity of primary flow. (2) the method of measuring mean gas temperatures  
 99 near observing ports 1-4. It was carried out with the above thermocouple device  
 100 through observing ports 1-4, and the device was kept in the furnace (near the  
 101 right-side wall about 1.5 m) less than 1 min to protect the thermocouple from  
 102 depositing seriously ash. (3) O<sub>2</sub>, CO, and NO<sub>x</sub> were sampled at the inlet of the air  
 103 pre-heater. An MSI EURO-type flue gas analyzer, with the measuring accuracy of  
 104 more than 99%, was employed with grid-based method to measure the components of  
 105 flue gas (including O<sub>2</sub>, CO and NO<sub>x</sub> concentrations). Then, the data of measured  
 106 points are averaged. The measurement error were about  $\pm 1\%$  for O<sub>2</sub>,  $\pm 50$  ppm for  
 107 CO, and  $\pm 20$  ppm for NO<sub>x</sub>. (4) The collected fly ash is mixed, and the carbon  
 108 content in ash is measured by using a proximate analyzer. The collected bottom ash is  
 109 also mixed, and the carbon content in ash is measured by using a proximate analyzer.

### 110 3. NOMENCLATURE

|     |        |                                                            |
|-----|--------|------------------------------------------------------------|
| 111 | MBEL   | Mitsui Babcock Energy Limited                              |
| 112 | B&W    | Babcock & Wilcox                                           |
| 113 | FW     | Foster Wheeler                                             |
| 114 | MIMSC  | multiple-injection and multiple-staging concept            |
| 115 | CHELNO | combined high-efficiency and low-NO <sub>x</sub> technique |
| 116 | OFA    | overfire air                                               |
| 117 | SOFA   | separated overfire air                                     |



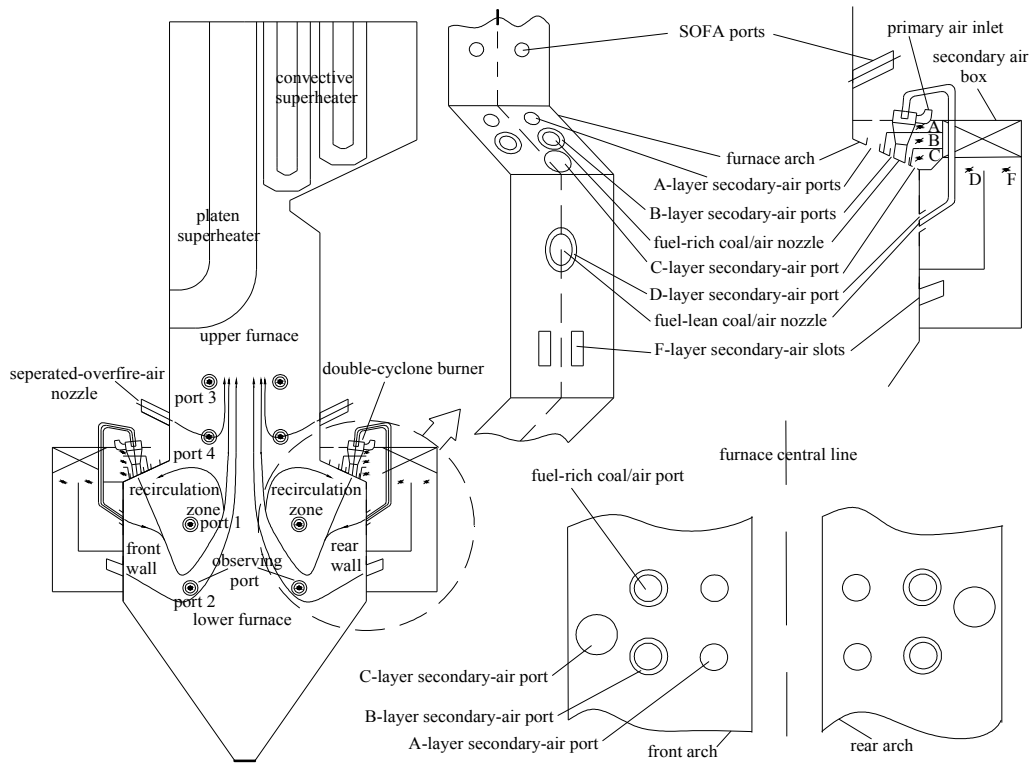

**Figure S2.** Schematics of the combustion system of the down-fired boiler with the novel combustion system.

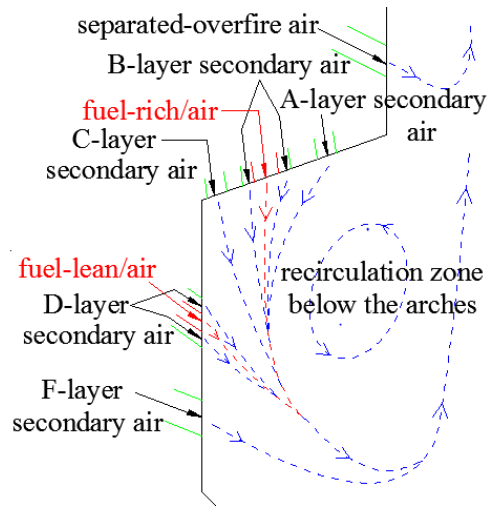

**Figure S3.** Detailed schematics of the novel combustion system

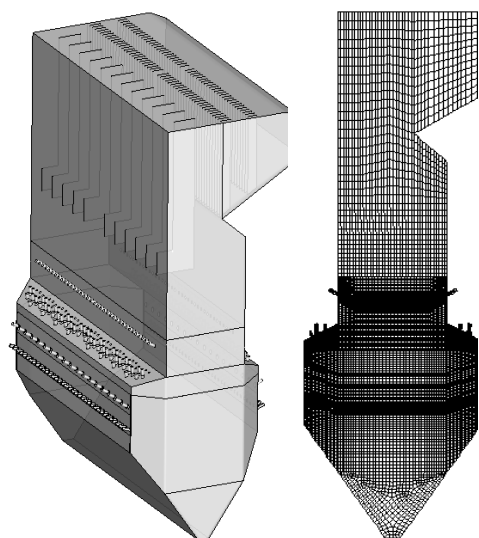

**Figure S4.** CFD model and grid division of the novel combustion system
